# Supplementary material for: Regulation of N&lt;sub&gt;2&lt;/sub&gt;O emissions from acid organic soil drained for agriculture: Effects of land use and season
Source: Copernicus journal article supplement (doi:10.5194/bg-2018-9), 2018-02-05
Supplement: Supplementary file [file bg-2018-9-AC2-supplement.pdf]

1 Anonymous Referee #1 Received and published: 8 May 2018  
2 Taghizadeh-Toosi and others study N<sub>2</sub>O emissions from a raised bog in northern  
3 Denmark. The study was performed competently but there are many highly  
4 speculative statements and the authors seem to continuously want to extend  
5 inference beyond what the data allow. Re-writing the paper to emphasize findings  
6 versus more speculative concepts that can be addressed in future studies would  
7 represent an improvement.

8  
9 Response: Thank you for this comment, and for reviewing our paper. The present  
10 study was planned to examine in more detail observations from an earlier study  
11 (Petersen *et al.*, 2012) – more specifically, apparent interactions between N  
12 availability and WT dynamics with respect to N<sub>2</sub>O emissions – and therefore it was by  
13 nature exploratory. In general, there are still large uncertainties regarding the  
14 mechanisms and pathways of N<sub>2</sub>O emissions from drained peat soils. Here we have  
15 offered an interpretation consistent with the above- and belowground dynamics of  
16 N<sub>2</sub>O observed, as well as soil characteristics. A graphical model analysis of potential  
17 drivers provided a quantitative analysis of relationships. We have indeed referred  
18 extensively to other literature to support our data interpretation, and to relate these  
19 new observations to existing knowledge, and this may be why some statements have  
20 come across as speculative. However, we will critically review and revise the text to  
21 ensure a better balance between own findings and discussion of the wider context.

22  
23 Reference:  
24 Petersen, S.O., Hoffmann, C. C., Schäfer, C.-M., Blicher-Mathiesen, G., Elsgaard, L., Kristensen, K.,  
25 Larsen, S. E., Torp, S. B., and Greve, M. H., 2012. Annual emissions of CH<sub>4</sub> and N<sub>2</sub>O, and ecosystem  
26 respiration, from eight organic soils in Western Denmark managed by agriculture. *Biogeosciences*, 9,  
27 403-422, doi: <https://doi.org/10.5194/bg-9-403-2012>.

28  
29 Minor comments follow:  
30 14: why is the soil “potentially” acid sulfate? (see also 81).

31  
32 Response: We refer to the terminology used by Madsen *et al.* (1988) cited in the  
33 paper. The distribution of iron sulfides in soil is heterogeneous, and the classification  
34 is based on soil sampling and analysis, and hence the classification is based on  
35 frequencies of occurrence. In the classification from the 1980s  
36 ([www2.mst.dk/Udgiv/publikationer/1984/87-88613-03-8/pdf/87-88613-03-8.pdf](http://www2.mst.dk/Udgiv/publikationer/1984/87-88613-03-8/pdf/87-88613-03-8.pdf), in  
37 Danish), the area of the present study was characterised as a potentially acid sulfate  
38 soil.

39  
40 Reference:  
41 Madsen, H.B. and Jensen, N.H., 1988. Potentially acid sulfate soils in relation to landforms and  
42 geology. *Catena*, 15, 137-145, doi: [https://doi.org/10.1016/0341-8162\(88\)90025-2](https://doi.org/10.1016/0341-8162(88)90025-2).

43  
44 Lots of speculative statements in the abstract. “probably competition from plants for  
45 available N”, “iron sulfides were probably the source”, “appear to be important  
46 controls”. These statements need to be supported or not made at all.

47

48 Response: In fact the statements referred to above were supported, either by findings  
49 of this study (iron oxides/hydroxides as the main sources of reactive iron; controlling  
50 WT depth and N supply could mediate against N<sub>2</sub>O emissions), or by literature cited  
51 in the discussion (a previous study had provided evidence for extensive N uptake by  
52 a grass sward). In view of the fact that we refer to field observations rather than  
53 results from controlled experiments, we believe it is good scientific practice not to  
54 make strong statements about causal relationships. We will, however, remove the  
55 statement referring to literature results from the abstract, to clarify what was observed  
56 in this study.

57

58 The Introduction is well-written, but would be improved if the “high emissions” on line  
59 68 were described quantitatively, and a hypothesis shouldn’t say “possibly” as this is  
60 less straightforward to falsify.

61

62 Response: We will change text to read “...where N<sub>2</sub>O emissions in excess of 2 mg m<sup>-2</sup> h<sup>-1</sup>  
63 were consistently observed.” We will further revise the hypothesis in order to  
64 avoid the term “possibly”.

65

66 103: the soil diffusion probes should be described in more detail rather than merely  
67 referring the reader to Petersen, 2014.

68

69 Response: The original text did include a description of the soil gas diffusion probe  
70 design, i.e., “*The stainless steel probes were constructed as described by Petersen*  
71 *(2014): with a 10 cm<sup>3</sup> cell connected to the surrounding soil via a 3 mm diameter*  
72 *opening at the sampling depth that was covered by a silicone membrane, and*  
73 *connected to the soil surface via two 18G steel tubes with Luer Lock fittings*  
74 *(Petersen, 2014).” (L.105-108) Also, the sampling procedure is described in some  
75 detail (L160-168). Any additional detail would only provide technical details such as  
76 suppliers of components, as in the method paper (Petersen, 2014). We feel this will  
77 not add to the clarity of the text and would prefer not to elaborate further. We will,  
78 however, include photo documentation of probes and sampling procedure as online  
79 ‘Supplementary Information’.*

80

81 Reference:

82 Petersen, S.O., 2014. Diffusion probe for gas sampling in undisturbed soil. *Eur. J. Soil Sci.*, 65, 663-  
83 671, doi:10.1111/ejss.12170.

84

85 Why could precipitation not be measured at the site? If it wasn’t measured, that’s ok,  
86 but I can’t think of a technical reason why it wouldn’t be able to be measured.

87

88 Response: We apologize for the unfortunate wording. Equipment used in the  
89 previous monitoring program (Petersen *et al.*, 2012) was no longer available, and  
90 resources for the present project did not allow for a new investment. Instead we used

91 measurements from the nearby meteorological station. The sentence will be revised  
92 to remove ambiguity.

93

94 Are fertilization rates typical for the land management practices? And why were  
95 measurements only made during morning hours? Is there a diurnal pattern in N<sub>2</sub>O  
96 flux that may be missed as a consequence?

97

98 Response: Yes, fertilization and other management followed the field operations of  
99 the individual fields (cf. section “2.3. Management”) except where stated.

100 Mid- to late morning periods were selected for samplings, since previous studies  
101 have indicated that the N<sub>2</sub>O flux at this time of day is often close to the daily average  
102 flux (Laville et al., 2011). Soil temperature is an important driver for N<sub>2</sub>O emissions  
103 and may indicate the potential error in the present study. We have therefore  
104 calculated deviations between soil temperature at 5 cm depth at sampling and the  
105 24-hour mean for all sampling days at each of the four locations. The mean  
106 deviations ranged from 0.2 to 0.85°C, and the overall largest deviations were -2.0  
107 and +2.1°C. Surface emissions lag behind the time of N<sub>2</sub>O production at depth in the  
108 soil (Clough *et al.* 1999), but temperature variations would also be dampened. We  
109 therefore believe, in agreement with current recommendations (de Klein and Harvey,  
110 2015), that mid-morning N<sub>2</sub>O flux measurements were representative for daily mean  
111 fluxes.

112

113 References:

114 Clough, T.J, Jarvis, S.C, Dixon, E.R, Stevens, R.J, Laughlin, R.J & Hatch, D.J, 1999, ‘Carbon induced  
115 subsoil denitrification of 15N-labelled nitrate in 1-m deep soil columns’, *Soil Biology and Biochemistry*.  
116 31, 31-41.

117

118 De Klein, C.A.M. & Harvey, M. (ed.), 2015. Nitrous Oxide Chamber Methodology Guidelines. Ministry  
119 of Primary Industries, Wellington, New Zealand. 146 pp.

120

121 Laville, P, Lehuger, S, Loubet, B, Chaumartin, F, & Cellier, P, 2011, ‘Effect of management, climate  
122 and soil conditions on N<sub>2</sub>O and NO emissions from an arable crop rotation using high temporal  
123 resolution measurements’, *Agricultural and Forest Meteorology*. 151, 228-240.

124

125 Just spell out weight on line 181.

126

127 Response: Thank you. “wt.” will be changed to “weight”.

128

129 On 234, was time of day an important factor? Or perhaps better yet temperature? I  
130 see these being included later but why not in the GLMM’s?

131

132 Response: We refer to the previous answer with respect to the potential effect of  
133 ‘time of day’ (i.e., temperature). Temperature was initially included in GLMM analysis,  
134 but removed because it was not a significant factor.

135

136 On 252 how are the properties optimal?

137  
138  
139  
140  
141  
142  
143  
144  
145  
146  
147  
148  
149  
150  
151  
152  
153  
154  
155  
156  
157  
158  
159  
160  
161  
162  
163  
164  
165  
166  
167  
168  
169  
170  
171  
172  
173  
174  
175  
176  
177  
178  
179  
180

Response: The optimal property referred in the text concerns the use of the BIC (Bayesian Information Criterion), i.e., the log-likelihood minus the number of parameters multiplied by the logarithm of the number of observations. Haughton (1988) proved that, when using this specific penalization of the log-likelihood function, the probability of choosing a correct model (i.e., a correct graphical representation) tends to one as the number of observations increases. Note that this property is not shared by other penalization procedures. This point will be clarified in the text.

315 why is water table depth not shown? This will help the interpretation.

Response: Since measurements of continuous water table depth were only available for potato crops in the autumn part of the study, we focused on the weekly recorded WT depths available at all sites in both seasons.

Try to avoid superlatives like 'dramatic' on line 340. Also, qualitative statements like 'low' on 374 and elsewhere are difficult to interpret and need to be removed or made quantitative.

Response: We will review the text and refer to quantitative information where possible. The results are also presented in Figures and Tables, and therefore, in order to ensure clarity of the text, in some cases a proper qualitative term may be appropriate.

The passage 'spring of 2000-6000 ug N<sub>2</sub>O m<sup>-2</sup> h<sup>-1</sup>' is confusing on line 371.

Response: We will reword this sentence to:

*"Fluxes during early spring reached 2000-6000 μg N<sub>2</sub>O m<sup>-2</sup> h<sup>-1</sup> and were higher than in late spring where, as for site RG1, no effect of N fertilization was observed."*

'were. . .occurring' on 372 needs to be re-worded.

Response: We will reword this sentence to:

*"The highest observations occurred, independent of fertilization, in June when a WT rise to 30 cm depth was observed."*

The argument on 435 about grass and competition with available N needs to be revisited. This is likely the case but you can't definitively say it here, only note that it is consistent with the notion (and the Schothorst 1977 reference seems to me to be a bit of a stretch to use in its justification). Perhaps the competition is an important course of future study and that results point toward it. Likewise the statement on 459 is highly speculative about the minearalization of N in potato crop residues. Grasslands also have lots of residues from deceased grass.

181 Response: The conclusion that the grass sward took up N at significant soil depths  
182 was not our interpretation, but the conclusion of Schothorst (1977), which will be  
183 made clear. We would like to include the specific information from this widely cited  
184 study in order to highlight the importance of vegetation for N availability in peat soil.  
185 More specific references to the supporting data on soil mineral N in Table S1 vs. S2  
186 will be made. They show consistently low soil mineral N concentrations at 25-50 cm  
187 depth under grassland (site *RG1*) compared to the neighbouring site used for a  
188 potato crop (site *AR1*).

189 With respect to the statement that potato crop residues were a main source of soil  
190 mineral N, we will again refer more specifically to the temporal dynamics of soil  
191 mineral N as revealed in Table S1 and S2 for sites *RG1* and *AR1*, respectively. We  
192 will include quantitative information about the accumulation of mineral N in early  
193 autumn at the two adjoining sites.

194  
195 The major finding of the graphical model on 468 is that N<sub>2</sub>O diffuses if concentration  
196 at depth is the most important factor. This is not a novel finding.

197  
198 Response: The main result here was not that N<sub>2</sub>O accumulation at depth in the soil  
199 was a main driver for N<sub>2</sub>O emissions, but that this was not always the case. The  
200 graphical model analysis found that, in the case of the potato crop in autumn, nitrate  
201 accumulation (and temperature) were more important in predicting N<sub>2</sub>O emissions.  
202 We take this as evidence that N<sub>2</sub>O emissions at grassland sites, and across the two  
203 potato sites during spring, were mainly controlled by the mineralization of N from  
204 decomposing peat. Following potato harvest, nitrate accumulated and, apparently,  
205 became the limiting factor after rainfall. We believe this interaction between season  
206 and land use, and the evidence for the different controls of N<sub>2</sub>O emissions, is new  
207 and interesting.

208  
209 'Rainfall most likely triggered' could be tested using the dataset.

210  
211 Response: The inclusion of rainfall as an independent factor is complicated by the  
212 lack of information about the temporal dynamics of WT depth after rainfall, and the  
213 change in water-filled porosity above the capillary fringe. Rainfall will induce an  
214 increase in WT depth, and in our analysis this was indirectly represented by  
215 determining soil N<sub>2</sub>O concentrations closest to, but above the WT depth. The  
216 inclusion of rainfall (or WT depth) as an independent variable would weaken the  
217 relationship between N<sub>2</sub>O accumulation in the capillary fringe and N<sub>2</sub>O emissions.

218  
219 The passage on 519 is entirely speculative. The (speculative) section 4.5 is well  
220 written, but it seems like the authors want to push their findings past the ability of the  
221 data to make them. This needs to be reconciled. AOA activity is a hypothesis for  
222 future studies, not to argue for given other studies including those from deep-sea  
223 water columns!

224

225 Response: We believe our results support the hypothesis that N<sub>2</sub>O was produced  
226 both above and below the WT depth, and we wanted to discuss possible pathways  
227 based on existing knowledge. On the other hand, we acknowledge that we may have  
228 taken the discussion a step too far by including examples beyond soil environments.  
229 The paragraph starting with L. 519 will be omitted, and Section 4.5 as a whole will be  
230 carefully scrutinized to avoid speculation without a firm link to findings and relevant  
231 literature.

232

233 Figure 1 is not informative. Please make a real map.

234

235 Response: We will extend Figure 1 to include a map showing the geographic  
236 distribution of sampling locations. However, we would like to also include the simple  
237 outline of the layout of each site in order to show the relative positions of gas  
238 chambers, gas diffusion probes, and piezometers among the three blocks, and the  
239 division among fertilised and non-fertilised subplots.

240

241 Many if not all figures would benefit from readable font sizes.

242

243 Response: We will inspect all Figures and increase font sizes where possible, i.e.,  
244 sub-plots in composite Figures must still be clearly separated. The contour plots  
245 represent a particular challenge, since here the resolution and font size for  
246 concentrations must be balanced. We have indeed spent time experimenting with this  
247 and find that the size already used is the best possible compromise.

248

249

250 Anonymous Referee #2

251 Received and published: 18 May 2018

252 General Comments:

253 This is a manuscript by Taghizadeh-Toosi and colleagues looking at N<sub>2</sub>O emissions,  
254 and driving factors, from drained histosols. This paper has some potential and  
255 interesting concepts within it. It could be of interest to readers of Biogeosciences.  
256 However, it has some major flaws. I'm not quite sure what the authors objectives of  
257 the paper are. They "searched for relationships" in N<sub>2</sub>O emissions, but why did they  
258 use two different fields? They hypothesized that N<sub>2</sub>O would be produced in the  
259 capillary fringe, but then they didn't show any data to confirm or deny this hypothesis.  
260 Where were the measurements in the capillary fringe and how did they confirm this?  
261 Not to mention there is a focus on season, but they only measured N<sub>2</sub>O for two  
262 seasons and just a couple measurements in each season. This is not enough to  
263 claim a "season effect". The manuscript itself is loosely held together, figures are  
264 difficult to interpret, and the writing is poor (See specific comments).

265

266 Response: Thank you for this comment, and for the evaluation of our paper. We  
267 would like to start by reiterating that this study was developed from observations  
268 made in a 14-month long monitoring study of N<sub>2</sub>O, CH<sub>4</sub> and CO<sub>2</sub> fluxes of eight  
269 organic soils used for agriculture (Petersen *et al.*, 2012); this study included the sites

270 *RG1* and *AR1*, but new sites *RG2* and *AR2* were included in this new study for  
271 verification of land use effects. The seasonal pattern in N<sub>2</sub>O emissions, and effects of  
272 land use, had therefore already been documented and were not objectives of this  
273 study. Based on the previous results we hypothesized that WT dynamics and soil  
274 mineral N status were important drivers of N<sub>2</sub>O emissions, and the present study  
275 focused on these periods with high N<sub>2</sub>O emissions. Compared to the previous study,  
276 we changed the sampling frequency from three weeks to one week, and we included  
277 new sites to confirm the trends observed previously at sites *RG1* and *AR1*.

278 This was an exploratory study, and we analysed relationships between N<sub>2</sub>O  
279 emissions and soil characteristics in search of important drivers. Two land uses were  
280 included, because the limited observations made in the previous study (Petersen *et*  
281 *al.*, 2012; Table 4) had indicated that soil mineral N availability would be different in  
282 these periods. With this experimental design we hoped to be able to separate the  
283 effect of WT depth from the effect of mineral N availability.

284 The comment regarding evidence for N<sub>2</sub>O production in the capillary fringe must be  
285 based on a misunderstanding, since we measured equivalent soil gas phase  
286 concentrations of N<sub>2</sub>O at 5, 10, 20, 50 and 100 cm depth (see contour plots in  
287 Figures 3 to 6). For the graphical model analysis, we filtered out N<sub>2</sub>O concentrations  
288 immediately above the (fluctuating) WT depth, and indeed the analysis found that this  
289 variable was strongly related to N<sub>2</sub>O emissions during spring with both land uses, as  
290 well as also in the autumn for site *RG1*.

291

292 Specific Comments:

293 L10. The Abstract seems too long. Consider shortening and making more clear and  
294 concise.

295

296 Response: We will revise the abstract to improve conciseness and focus on findings  
297 from the study.

298

299 L18. Change 'recorded' to 'measured'

300

301 Response: We would like to keep the broader term "*recorded*" as a verb here, since  
302 the information gathered consisted of a variety of measurements, including weather  
303 station data.

304

305 L24. 'In connection' is not the appropriate term here.

306

307 Response: We will change to "*after rainfall*".

308

309 L43. Delete 'depth'

310

311 Response: Will be done.

312

313 L44-45. What about CH<sub>4</sub>? Seems like the shift in CH<sub>4</sub> production/consumption could  
314 offset some of the new losses when drying a peat soil?

315  
316  
317  
318  
319  
320  
321  
322  
323  
324  
325  
326  
327  
328  
329  
330  
331  
332  
333  
334  
335  
336  
337  
338  
339  
340  
341  
342  
343  
344  
345  
346  
347  
348  
349  
350  
351  
352  
353  
354  
355  
356  
357  
358

Response: The previous study (Petersen *et al.*, 2012) showed that CH<sub>4</sub> fluxes from arable soil and rotational grass were low throughout the year, and CH<sub>4</sub> was therefore not considered in the present study.

L51. What do you mean by 'site conditions'? This is very vague.

Response: In fact the next sentence defines site conditions:  
*"Site conditions are defined by land use, management, inherent soil properties and climate (Mander et al., 2010; Leppelt et al., 2014)."* (L51-52) Further, L. 52-58 provides examples of relationships between individual soil characteristics and N<sub>2</sub>O emissions.

L66. Change 'soil conditions' to 'soils. Replace 'with' with 'under'. Delete 'in the experimental year'

Response: We respectfully argue to keep the exact wording here. 'Acid soil' is a generalising term, but the four sites differed in several respects besides pH. The potato crop was established and harvested in the middle of the spring and autumn measurement periods, respectively, and therefore 'under a potato crop' would not be accurate.

L70. Change 'pursued the hypotheses' to 'hypothesized'

Response: Will be done.

L83. What does 'after field trips and meetings with farmers' have to do with how the field sites were distributed? Could you be more specific?

Response: Poor wording, will be changed to:  
*"Following field trips and meetings with farmers, four field sites were found that were distributed along an east-west transect."*

L93. Figure one is not very informative. Please change. Show more details or a key.

Response: Key to elements will be included in the Figure. As stated above, a map of the area showing distribution of sites will also be included.

L116. Add 'e.g.' after 1st parentheses. Move parenthetical statement after 'farmers'

Response: Will be done.

L255. Delete 'monitoring period'



359 Response: We prefer to keep this term, since 'spring' is not a well-defined period, and  
360 we would like to emphasize conditions specific to our monitoring periods.

361  
362 L256. Delete 'monitoring period'

363  
364 Response: Please see the previous response regarding spring.

365  
366 L267. Add 's' after 'soil', and change 'was' to 'were'

367  
368 Response: Will be done.

369  
370 L283-284. Delete sentence.

371  
372 Response: We understand the reviewer's intent to improve conciseness by avoiding  
373 sentences which guide the reader to specific results. We will revise the text in order  
374 to integrate references to Figures and Tables in sentences describing the results.

375  
376 L305. Delete sentence.

377  
378 Response: Please see comment to L. 283-284.

379  
380 L326-328. Delete sentence. It is not necessary to tell where data is shown. Just  
381 describe the data and then put the Figure number in parentheses.

382  
383 Response: Please see comment to L. 283-284.

384  
385 L337-338. Why is this sentence out by itself? It should be in a paragraph

386  
387 Response: This sentence referred to results from the autumn measurement period.  
388 Although the paragraph consists of only one statement, we would like to avoid  
389 merging spring and autumn results into one paragraph, since the results showed  
390 qualitative differences.

391  
392 L361-363. Delete sentence. Same as previous comment.

393  
394 Response: Done.

395
